# Supplementary material for: The basic reproductive ratio of Barbour’s two-host schistosomiasis model with seasonal fluctuations
Source: PubMed Central journal article supplement (PMC5264280; doi:10.1186/s13071-017-1983-1), 2017-01-25
Supplement: 13071_2017_1983_MOESM1_ESM.pdf [file 13071_2017_1983_MOESM1_ESM.pdf]

## Appendix A: Derivation of $R_0$

In this part, we will describe the determination procedure for the implicit formula of the basic reproductive ratio of system (2.1) according to the general procedure established by Wang and Zhao [1]. It is easy to see that system (2.1) has exactly one disease-free solution  $E_0 = (0, 0, 0)$ .

Let  $x = (P_1, P_2, y)^T$ . Then model (2.1) can be written as

$$\frac{dx}{dt} = \mathcal{F}(t, x) - \mathcal{V}(t, x),$$

where

$$\mathcal{F}(t, x) = \begin{pmatrix} a_1(t)\Delta y(1 - P_1) \\ a_2(t)\Delta y(1 - P_2) \\ \left(\frac{b_1(t)\Sigma_1 P_1 + b_2(t)\Sigma_2 P_2}{\Delta}\right)(1 - y) \end{pmatrix},$$

and

$$\mathcal{V}(t, x) = \begin{pmatrix} g_1 P_1 \\ g_2 P_2 \\ \mu y \end{pmatrix}.$$

By the arguments similar to those in [2], it then follows that

$$D_x \mathcal{F}(t, E_0) = F(t) \text{ and } D_x \mathcal{V}(t, E_0) = V(t).$$

We can get

$$F(t) = \begin{pmatrix} 0 & 0 & a_1(t)\Delta \\ 0 & 0 & a_2(t)\Delta \\ \frac{b_1(t)\Sigma_1}{\Delta} & \frac{b_2(t)\Sigma_2}{\Delta} & 0 \end{pmatrix}, \quad V(t) = \begin{pmatrix} g_1 & 0 & 0 \\ 0 & g_2 & 0 \\ 0 & 0 & \mu \end{pmatrix}.$$

It is easy to see that  $F(t)$  is non-negative, and  $-V(t)$  is cooperative in the sense that the off-diagonal elements of  $V(t)$  are non-negative. Let  $\Phi_V(t)$  be the monodromy matrix of the linear  $\omega$ -period system  $\frac{dz}{dt} = V(t)z$  and  $\rho(\Phi_V(\omega))$  be the spectral radius of  $\Phi_V(\omega)$ .

Let  $Y(t, s)$  ( $t \geq s$ ) be a  $3 \times 3$  matrix solution of the system

$$\frac{d}{dt} Y(t, s) = -V(t)Y(t, s), \quad \forall t \geq s, \quad \text{and } Y(s, s) = I,$$

where  $I$  is the  $3 \times 3$  identity matrix. Thus, the monodromy matrix  $\Phi_{-V}(t)$  of  $\frac{dy}{dt} = -V(t)y$  is equal to  $Y(t, 0)$ ,  $t \geq 0$ .

In view of the periodic environment, we assume that  $\phi(s)$ ,  $\omega$ -periodic in  $s$ , is the initial distribution of infectious individuals. Then  $F(s)\phi(s)$  is the rate of new infections produced by

the infected individuals who were introduced at time  $s$ . Given  $t \geq s$ , then  $Y(t, s)F(s)\phi(s)$  gives the distribution of those infected individuals who were newly infected at time  $s$  and remain in the infected compartments at time  $t$ . It follows that

$$\psi(t) = \int_{-\infty}^t Y(t, s)F(s)\phi(s)ds = \int_0^{\infty} Y(t, t-a)F(t-a)\phi(t-a)da$$

is the distribution of accumulative new infections at time  $t$  produced by all those infected individuals  $\phi(s)$  introduced at time previous to  $t$ .

Let  $C_\omega$  be the ordered Banach space of all  $\omega$ -periodic functions from  $R$  to  $R^3$ , which is equipped with the maximum norm  $\|\cdot\|$  and the positive cone  $C_\omega := \{\phi \in C_\omega : \phi(t) \geq 0, \forall t \in R\}$ . Then we can define a linear operator  $L : C_\omega \rightarrow C_\omega$  by

$$(L\phi)(t) = \int_0^{\infty} Y(t, t-a)F(t-a)\phi(t-a)da, \quad \forall t \in R, \phi \in C_\omega$$

where  $L$  is called the next infection operator. The basic reproduction rate of system (2.1) is defined as the spectral radius of  $L$ , i.e.  $R_0 = \rho(L)$ .

In order to characterize  $R_0$ , we consider the following linear  $\omega$ -periodic equation

$$\frac{dw}{dt} = \left[ -V(t) + \frac{F(t)}{\lambda} \right] w, \quad t \in R \quad (\text{A.1})$$

with parameter  $\lambda \in (0, \infty)$ . Let  $W(t, s, \lambda)$ ,  $t \geq s$ ,  $s \in R$  be the evolution operator of system (A.1) on  $R^3$ . We have

$$\begin{aligned} W(\omega, 0, \lambda) &= \exp \left[ \int_0^{\infty} \left( -V(t) + \frac{F(t)}{\lambda} \right) dt \right] \\ &= \exp \left[ \int_0^{\omega} \begin{pmatrix} -g_1 & 0 & \frac{a_1(t)\Delta}{\lambda} \\ 0 & -g_2 & \frac{a_2(t)\Delta}{\lambda} \\ \frac{b_1\Sigma_1}{\lambda\Delta} & \frac{b_2\Sigma_2}{\lambda\Delta} & -\mu \end{pmatrix} dt \right], \quad \forall \lambda > 0. \end{aligned}$$

It is easy to verify that system (2.1) satisfies assumptions (A1)–(A7) in Wang and Zhao [1]. Thus, we obtain the following two results, which will be used in our numerical computation of the basic reproduction ratio and the proof of our main result, respectively.

**Lemma A.1.** The following statements are valid:

(i) If  $\rho(W(\omega, 0, \lambda)) = 1$  has a positive solution  $\lambda_0$ , then  $\lambda_0$  is an eigenvalue of  $L$ , and hence  $R_0 > 0$ .

(ii) If  $R_0 > 0$ , then  $\lambda = R_0$  is the unique solution of  $\rho(W(\omega, 0, \lambda)) = 1$ .

(iii)  $R_0 = 0$  if and only if  $r(W(\omega, 0, \lambda)) < 1$  for all  $\lambda > 0$ .

**Lemma A.2.** The following statements are valid:

(i)  $R_0 = 1$  if and only if  $\rho(\Phi_{F-V}(\omega)) = 1$ .

(ii)  $R_0 > 1$  if and only if  $\rho(\Phi_{F-V}(\omega)) > 1$ .

(iii)  $R_0 < 1$  if and only if  $\rho(\Phi_{F-V}(\omega)) < 1$ .

Thus, the disease-free solution  $E_0$  is locally asymptotically stable if  $R_0 < 1$ , and unstable if  $R_0 > 1$ .

Lemma A.1(ii) shows that the basic reproduction rate is determined by parameter  $\lambda$  of  $\rho(W(\omega, 0, \lambda)) = 1$ . We can calculate the basic reproduction ratio  $R_0$  using the numerical method.

## Appendix B-Proof of the main result

Here we define  $X := \{(P_1, P_2, y) : 0 < P_1 \leq 1, 0 < P_2 \leq 1, 0 < y \leq 1\}$  for system (2.1). It is easy to obtain the following theorem.

**Theorem B.1.** System (2.1) has a unique solution with the initial value

$$(P_1^0, P_2^0, y^0) \in X := \{(P_1, P_2, y) : 0 < P_1 \leq 1, 0 < P_2 \leq 1, 0 < y \leq 1\},$$

and this compact set is positively invariant.

Define

$$X_0 = \{(P_1, P_2, y) \in X : P_1 > 0, P_2 > 0, y > 0\}, \quad \partial X_0 = X/X_0.$$

Let  $H : X \rightarrow X$  be the Poincaré map associated with system (2.1), that is,

$$H(x^0) = u(\omega, x^0), \quad \forall x^0 \in X,$$

where  $u(t, x^0)$  is the unique solution of system (2.1) with  $u(0, x^0) = x^0$ . It is easy to see that

$$H^m(P_1^0, P_2^0, y^0) = u(m\omega, (P_1^0, P_2^0, y^0)), \quad \forall m \in Z_+,$$

where  $Z_+$  is the set of all non-negative integers. Next, we establish the following lemma which will be useful in the proof of our main result.

**Lemma B.1.** If the basic reproduction ratio  $R_0 > 1$ , then there exists a  $\sigma^* > 0$ , such that for any  $(P_1^0, P_2^0, y^0) \in X_0$  with

$$\|(P_1^0, P_2^0, y^0) - E_0\| \leq \sigma^*,$$

we have

$$\limsup d(H^m(P_1^0, P_2^0, y^0), E_0) \geq \sigma^*. \quad (B.1)$$

**Proof.** Since  $R_0 > 1$ , Lemma A.2 implies  $\rho(\Phi_{F-V}(\omega)) > 1$ . It follows that  $\rho(\Phi_{F-V-M_\sigma}(\omega)) > 1$  holds for sufficiently small  $\sigma > 0$ , where

$$M_\sigma = \begin{pmatrix} 0 & 0 & a_1(t)\Delta\sigma \\ 0 & 0 & a_2(t)\Delta\sigma \\ b_1(t)\Sigma_1\sigma/\Delta & b_2(t)\Sigma_2\sigma/\Delta & 0 \end{pmatrix}.$$

By the continuity of the solutions with respect to the initial values, there exists a  $\sigma^* > 0$  such that for all  $(P_1^0, P_2^0, y^0) \in X_0$  with  $\|(P_1^0, P_2^0, y^0) - E_0\| \leq \sigma^*$ , there holds  $\|u(t, (P_1^0, P_2^0, y^0)) - u(t, E_0)\| \leq \sigma$ , for all  $t \in [0, \omega]$ . Next, we claim that  $\limsup_{m \rightarrow \infty} d(H^m(P_1^0, P_2^0, y^0), E_0) \geq \sigma^*$ . Assume, by contradiction, that (B.1) does not hold. Then we have

$$\limsup_{m \rightarrow \infty} d(H^m(P_1^0, P_2^0, y^0), E_0) < \sigma^*$$

for some  $(P_1^0, P_2^0, y^0) \in X_0$ . Without loss of generality, we assume that  $d(H^m(P_1^0, P_2^0, y^0), E_0) < \sigma^*$ , for all  $m \geq 0$ . It follows that  $\|u(t, H^m(P_1^0, P_2^0, y^0)) - u(t, E_0)\| = \|u(t, H^m(P_1^0, P_2^0, y^0))\| < \sigma, \forall m \geq 0, \forall t \in [0, \omega]$ . For any  $t \geq 0$ , let  $t = m\omega + t'$ , where  $t' \in [0, \omega)$ , and  $m$  is the largest integer less than or equal to  $t/\omega$ . Therefore, we have

$$\|u(t, (P_1^0, P_2^0, y^0)) - u(t, E_0)\| = \|u(t', H^m(P_1^0, P_2^0, y^0))\| < \sigma, \quad \text{for all } t \geq 0.$$

Note that  $(P_1(t), P_2(t), y(t)) = u(t, (P_1^0, P_2^0, y^0))$ . It then follows that  $P_1(t) < \sigma, P_2(t) < \sigma, y(t) < \sigma$ , for all  $t \geq 0$ . From system (2.1), we get

$$\begin{cases} \frac{dP_1}{dt} \geq a_1(t)\Delta y(1 - \sigma) - gP_1, \\ \frac{dP_2}{dt} \geq a_2(t)\Delta y(1 - \sigma) - gP_2, \\ \frac{dy}{dt} \geq \left( \frac{b_1(t)\Sigma_1 P_1 + b_2(t)\Sigma_2 P_2}{\Delta} \right) (1 - \sigma) - \mu y. \end{cases} \quad (B.2)$$

We then consider the following system

$$\begin{cases} \frac{d\hat{P}_1}{dt} = a_1(t)\Delta\hat{y}(1 - \sigma) - g\hat{P}_1, \\ \frac{d\hat{P}_2}{dt} = a_2(t)\Delta\hat{y}(1 - \sigma) - g\hat{P}_2, \\ \frac{d\hat{y}}{dt} = \left( \frac{b_1(t)\Sigma_1\hat{P}_1 + b_2(t)\Sigma_2\hat{P}_2}{\Delta} \right) (1 - \sigma) - \mu\hat{y}. \end{cases} \quad (B.3)$$

By Zhang and Zhao ([3], Lemma 2.1), we know that there exists a positive,  $\omega$ -period function  $(\bar{P}_1(t), \bar{P}_2(t), \bar{y}(t))^T$  such that  $(\hat{P}_1(t), \hat{P}_2(t), \hat{y}(t))^T = e^{\xi t}(\bar{P}_1(t), \bar{P}_2(t), \bar{y}(t))^T$  is a solution of system (B.3), where  $\xi = \frac{1}{\omega} \ln \rho(\Phi_{F-V-M_\sigma}(\omega))$ . It follows from  $\rho(\Phi_{F-V-M_\sigma}(\omega)) > 1$  that  $\xi$  is a positive constant. Let  $t = n\omega$ , here  $n \in \mathbb{Z}_+$ . We have

$$(\hat{P}_1(n\omega), \hat{P}_2(n\omega), \hat{y}(n\omega))^T = e^{\xi n\omega}(\bar{P}_1(n\omega), \bar{P}_2(n\omega), \bar{y}(n\omega))^T \rightarrow (\infty, \infty, \infty)^T \text{ as } n \rightarrow \infty.$$

For any nonnegative initial condition  $(P_1(0), P_2(0), y(0))^T$  of system (B.2), there exists a sufficiently small  $m^* > 0$  such that  $(P_1(0), P_2(0), y(0))^T \geq m^*(\bar{P}_1(0), \bar{P}_2(0), \bar{y}(0))^T$ . By the comparison principle, we have  $(P_1(t), P_2(t), y(t))^T \geq m^*(\hat{P}_1(t), \hat{P}_2(t), \hat{y}(t))^T$ , for all  $t > 0$ . Thus, we obtain  $P_1(n\omega) \rightarrow \infty$ ,  $P_2(n\omega) \rightarrow \infty$  and  $y(n\omega) \rightarrow \infty$ , as  $n \rightarrow \infty$ , a contradiction. This completes the proof.

Based on the above work, we give the main result as mentioned in Materials and Methods, which may be written in the form of following theorem.

**Theorem B.2.** If the basic reproduction ratio  $R_0 < 1$ , then the unique disease-free solution  $E_0 = (0, 0, 0)$  is globally asymptotically stable. Whereas if the basic reproduction ratio  $R_0 > 1$ , then there exists a constant  $\delta > 0$  such that any solution  $(P_1(t), P_2(t), y(t))$  of system (2.1) with initial value  $(P_1(0), P_2(0), y(0)) \in X_0$  satisfies

$$\liminf_{t \rightarrow \infty} P_1(t) \geq \delta, \quad \liminf_{t \rightarrow \infty} P_2(t) \geq \delta, \quad \text{and} \quad \liminf_{t \rightarrow \infty} y(t) \geq \delta.$$

**Proof:** In the case  $R_0 < 1$ , Lemma A.2 implies that the disease-free periodic state  $E_0$  is locally asymptotically stable. It is sufficient to prove that  $E_0$  is globally attractive if  $R_0 < 1$ . From system (2.1), we have

$$\begin{cases} \frac{dP_1}{dt} \leq a_1(t)\Delta y - gP_1, \\ \frac{dP_2}{dt} \leq a_2(t)\Delta y - gP_2, \\ \frac{dy}{dt} \leq \frac{b_1(t)\Sigma_1 P_1 + b_2(t)\Sigma_2 P_2}{\Delta} - \mu y. \end{cases} \quad (\text{B.4})$$

Consider the following comparison system

$$\frac{dh(t)}{dt} = (F(t) - V(t))h(t). \quad (\text{B.5})$$

Applying Lemma A.2, we know that  $R_0 < 1$  if and only if  $\rho(\Phi_{F-V}(\omega)) < 1$ . By Zhang and Zhao ([3], Lemma 2.1), it follows that there exists a positive,  $\omega$ -period function  $\bar{h}(t)$  such that  $h(t) = e^{\theta t} \bar{h}(t)$  is a solution of system (B.5), where  $\theta = \frac{1}{\omega} \ln \rho(\Phi_{F-V}(\omega))$ . Since  $\rho(\Phi_{F-V}(\omega)) < 1$ , then  $\theta < 0$ . Therefore, we have  $h(t) \rightarrow 0$  as  $t \rightarrow +\infty$ . This implies that the zero solution of system (B.5) is globally asymptotically stable. For any nonnegative initial value  $(P_1(0), P_2(0), y(0))^T$  of system (B.4), there is a sufficiently large  $M^* > 0$  such that  $(P_1(0), P_2(0), y(0))^T \leq M^* \bar{h}(0)$  holds. Applying the comparison principle [4], we have  $(P_1(t), P_2(t), y(t))^T \leq M^* h(t)$ , for all  $t > 0$ , where  $M^* h(t)$  is also the solution of system (B.5). Therefore, we get  $P_1(t) \rightarrow 0$ ,  $P_2(t) \rightarrow 0$  and  $y(t) \rightarrow 0$  as  $t \rightarrow +\infty$ . We finish the proof of the first part.

By Theorem B.1, the discrete-time system  $\{H^m\}_{m \geq 0}$  admits a global attractor in  $X$ . Now we prove that  $\{H^m\}_{m \geq 0}$  is uniformly persistent with respect to  $(X_0, \partial X_0)$ . Clearly, there is exactly one fixed point  $E_0 = (0, 0, 0)$  of  $H$  in  $\partial X_0$ . Lemma B.1 implies that  $E_0 = (0, 0, 0)$  is an isolated invariant set in  $X$  and  $W^S(E_0) \cap X_0 = \emptyset$ . By Zhao ([5], Theorem 1.3.1), it follows that  $H$  is uniformly persistent with respect to  $(X_0, \partial X_0)$ . By Zhao ([5], Theorem 3.1.1), the solutions of system (2.1) are uniformly persistent with respect to  $(X_0, \partial X_0)$ , that is, there exists a constant  $\delta > 0$  such that any solution  $(P_1(t), P_2(t), y(t))$  of system (2.1) with initial value  $(P_1(0), P_2(0), y(0)) \in X_0$  satisfies

$$\liminf_{t \rightarrow \infty} P_1(t) \geq \delta, \quad \liminf_{t \rightarrow \infty} P_2(t) \geq \delta, \quad \text{and} \quad \liminf_{t \rightarrow \infty} y(t) \geq \delta.$$

## References

- [1] Wang WD, Zhao XQ: **Threshold dynamics for compartmental epidemic models in periodic environments.** *J Dyn Diff Equat* 2008, **20**: 699-717.
- [2] P., Watmough, J.: **Reproduction numbers and sub-threshold endemic equilibria for compartmental models of disease transmission.** *Math Biosci* 2002, **180**: 29-48.
- [3] Zhang F, Zhao XQ: **A periodic epidemic model in a patchy environment.** *J Math Anal Appl* 2007, **325**: 496-516.
- [4] Smith HL, Walman P: *The Theory of the Chemostat.* Cambridge: Cambridge University Press; 1995.
- [5] Zhao XQ: *Dynamical Systems in Population Biology.* New York: Springer; 2003.
